# Supplementary material
Source: MDPI journal article supplement (https://www.mdpi.com/2311-5629/5/3/50)
Supplement: s1 [file s1]

## Supplementary Materials

# Atom Probe Tomography (APT) Characterization of Organics Occluded in Single Calcite Crystals: Implications for Biomineralization Studies

Alberto Pérez-Huerta <sup>1,\*</sup>, Michio Suzuki <sup>2</sup>, Chiara Cappelli <sup>1</sup>, Fernando Laiginhas <sup>1</sup> and Hiroyuki Kintsu <sup>2</sup>

<sup>1</sup> Department of Geological Sciences, The University of Alabama, Tuscaloosa AL 35487, USA

<sup>2</sup> Department of Applied Biological Chemistry, Graduate School of Agricultural and Life Sciences, The University of Tokyo, Tokyo 113-8657, Japan

\* Correspondence: aphuerta@ua.edu; Tel.: +1-205-535-0851

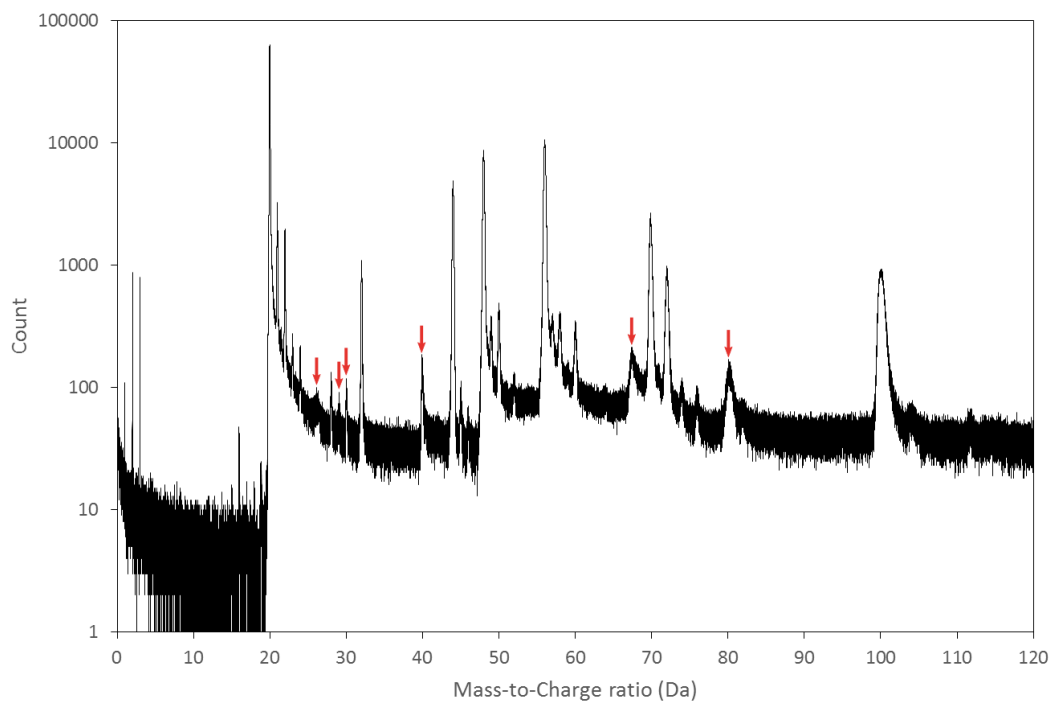

**Figure S1.** Example of representative APT mass spectra for calcite and chitin hydrogel. (Note: **Red** arrows indicate some representative peaks indicative of chitin; more details in Table 2).

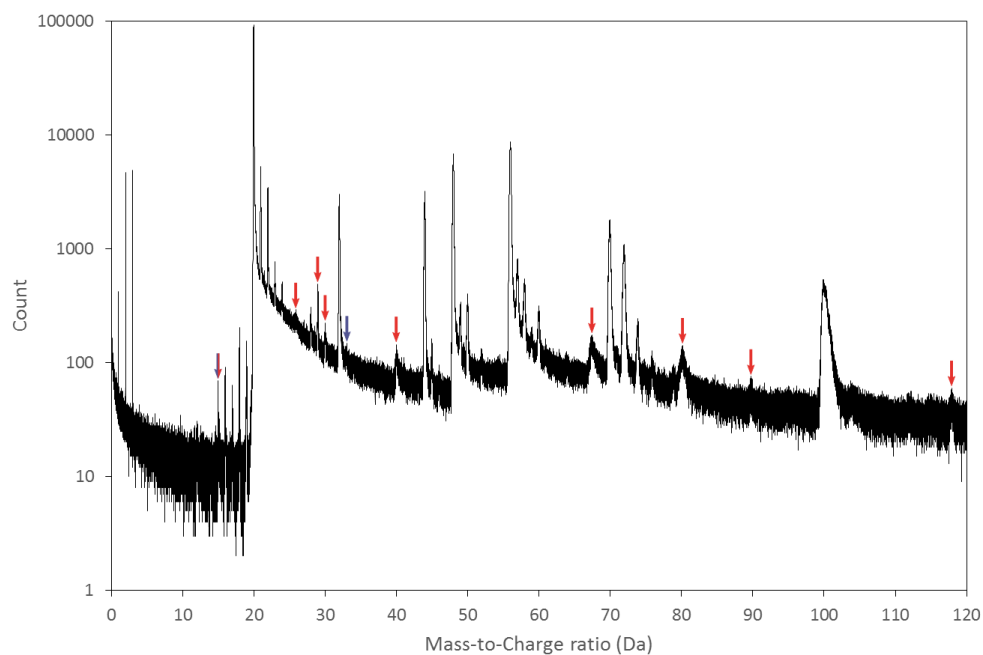

**Figure S2.** Example of representative APT mass spectra for calcite and chitin at 0.12 mg/mL concentration of yatalase. (Note: **Red** and **blue** arrows indicate some representative peaks indicative of chitin and yatalase, respectively; more details in Table 2).

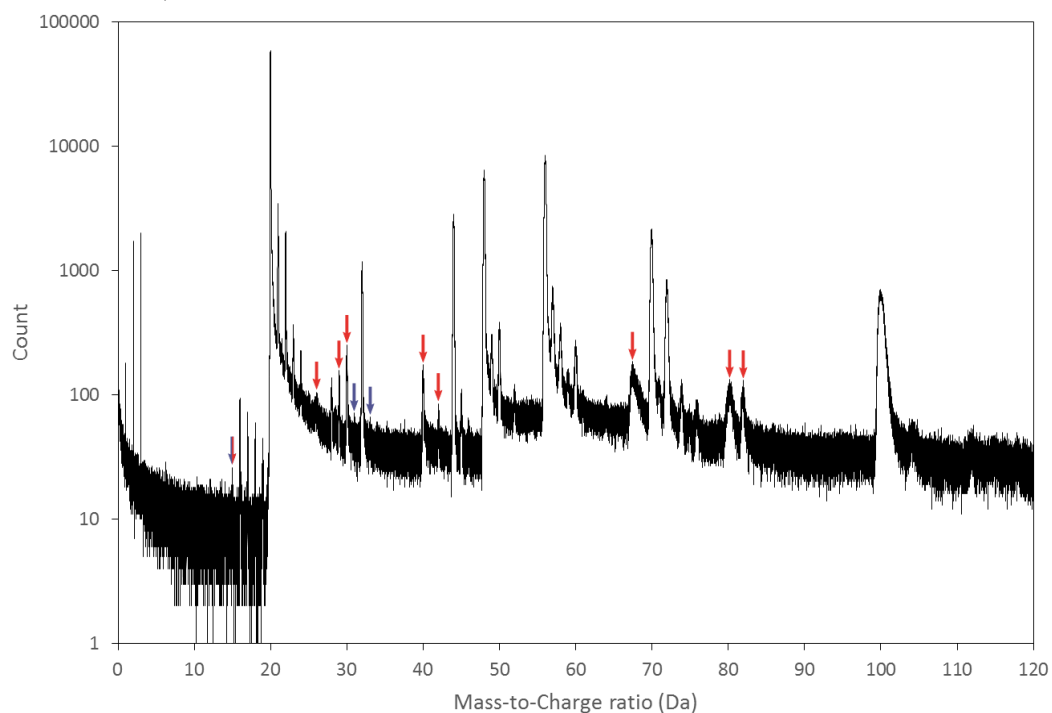

**Figure 3.** Example of representative APT mass spectra for calcite and chitin at 1.2 mg/mL concentration of yatalase. (Note: **Red** and **blue** arrows indicate some representative peaks indicative of chitin and yatalase, respectively; more details in Table 2).

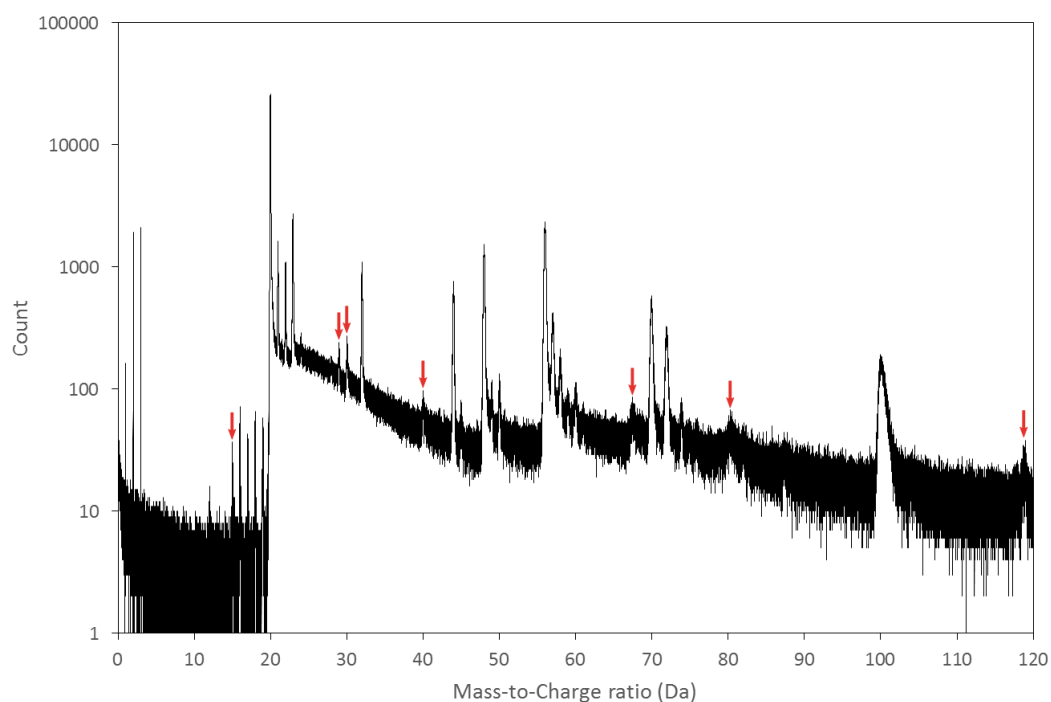

**Figure 4.** Example of representative APT mass spectra for calcite and chitin nanofibers. (Note: **Red** arrows indicate some representative peaks indicative of chitin; more details in Table 2).

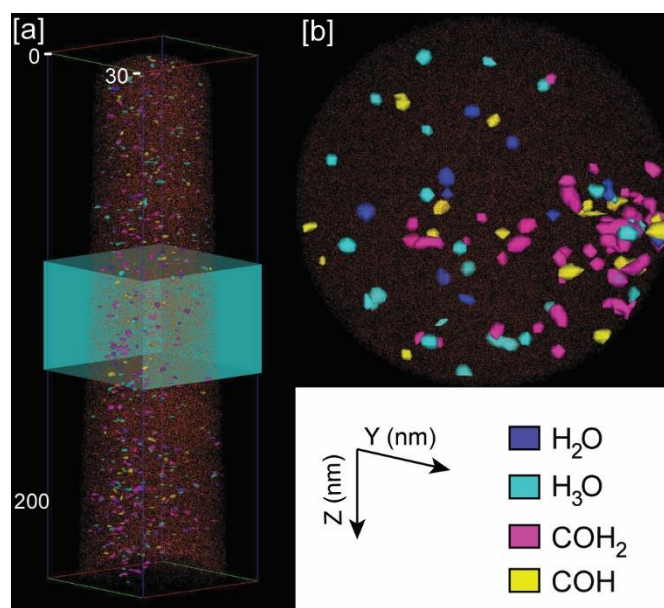

**Figure 5.** Example of APT 3D tip reconstruction for calcite with occluded chitin hydrogel fragments; (a) General view; (b) Orthogonal projection view (along Z axis) of a slice of the tip within the blue box in (a). Notes: Dimensions, along Z and Y axes, are in nm; red dots correspond to Ca atoms; chitin fragments recognized by  $\text{COH}^-$ ,  $\text{COH}_2^-$ , and associated water ( $\text{H}_2\text{O}$ ) and hydronium ( $\text{H}_3\text{O}^+$ ) molecules.

Table S1. Measured elemental atomic concentration (%) for all analyzed tips.

| Specimen 1536_0 Yatalase |              |          |                | Specimen 1619_0.12 Yatalase |              |          |                | Specimen 1560_1.2 Yatalase |              |          |                | Specimen 1644_ChitinFiber |             |          |                |
|--------------------------|--------------|----------|----------------|-----------------------------|--------------|----------|----------------|----------------------------|--------------|----------|----------------|---------------------------|-------------|----------|----------------|
| Element                  | Atom count   | Atomic % | Atomic error % | Element                     | Atom count   | Atomic % | Atomic error % | Element                    | Atom count   | Atomic % | Atomic error % | Element                   | Atom count  | Atomic % | Atomic error % |
| C                        | 1,884,114.0  | 7.34%    | 0.0004%        | C                           | 1,165,352.5  | 5.052%   | 0.0007%        | C                          | 1,550,622.6  | 7.06%    | 0.0006%        | C                         | 292,215.4   | 4.71%    | 0.0009%        |
| Ca                       | 14,417,368.3 | 56.15%   | 0.0160%        | Ca                          | 14,111,918.7 | 61.18%   | 0.014%         | Ca                         | 12,089,332.2 | 55.03%   | 0.0174%        | Ca                        | 3,669,268.5 | 59.12%   | 0.0317%        |
| H                        | 535,717.1    | 2.09%    | 0.001%         | H                           | 962,311.8    | 4.17%    | 0.0019%        | H                          | 720,779.5    | 3.28%    | 0.001%         | H                         | 368,606.2   | 5.94%    | 0.0018%        |
| N                        | 532.3        | 0.002%   | 0.0001%        | N                           | 11,753.8     | 0.05%    | 0.0005%        | N                          | 5520.7       | 0.03%    | 0.0005%        | N                         | 6534.8      | 0.11%    | 0.0007%        |
| Na                       | 14,364.8     | 0.06%    | 0.0016%        | Na                          | 31,653.7     | 0.14%    | 0.0024%        | Na                         | 22,726.8     | 0.103%   | 0.0018%        | Na                        | 290,858.9   | 4.69%    | 0.0144%        |
| O                        | 8,824,961.4  | 34.37%   | 0.0005%        | O                           | 6,764,071.1  | 29.32%   | 0.0008%        | O                          | 7,549,411.0  | 34.37%   | 0.0007%        | O                         | 1,577,964.1 | 25.43%   | 0.0018%        |
|                          |              |          |                | P                           | 973.7        | 0.004%   | 0.0015%        | P                          | 1336.2       | 0.01%    | 0.0011%        | P                         | 522.0       | 0.01%    | 0.0042%        |
|                          |              |          |                | S                           | 19,683.1     | 0.09%    | 0.0387%        | S                          | 27,580.3     | 0.126%   | 0.0291%        |                           |             |          |                |
| Specimen 1620_0 Yatalase |              |          |                | Specimen 1592_0.12 Yatalase |              |          |                | Specimen 1618_1.2 Yatalase |              |          |                | Specimen 1643_ChitinFiber |             |          |                |
| Element                  | Atom count   | Atomic % | Atomic error % | Element                     | Atom count   | Atomic % | Atomic error % | Element                    | Atom count   | Atomic % | Atomic error % | Element                   | Atom count  | Atomic % | Atomic error % |
| C                        | 1,090,581.8  | 7.10%    | 0.0004%        | C                           | 1,346,631.7  | 5.20%    | 0.0004%        | C                          | 1,306,839.0  | 6.83%    | 0.0007%        | C                         | 185,700.6   | 3.05%    | 0.0016%        |
| Ca                       | 8,470,402.7  | 55.16%   | 0.0191%        | Ca                          | 15,137,987.9 | 58.45%   | 0.0158%        | Ca                         | 10,426,381.4 | 54.51%   | 0.0168%        | Ca                        | 3,934,738.7 | 64.64%   | 0.0239%        |
| H                        | 459,295.0    | 2.99%    | 0.0028%        | H                           | 1,310,097.8  | 5.06%    | 0.0015%        | H                          | 1,132,041.3  | 5.92%    | 0.0020%        | H                         | 334,874.9   | 5.50%    | 0.0032%        |
| N                        | 8073.5       | 0.05%    | 0.0003%        | N                           | 4347.5       | 0.02%    | 0.0003%        | N                          | 30,237.4     | 0.16%    | 0.0006%        | N                         | 1675.1      | 0.03%    | 0.0012%        |
| Na                       | 4268.4       | 0.03%    | 0.0037%        | Na                          | 71,756.3     | 0.28%    | 0.0022%        | Na                         | 28,950.2     | 0.15%    | 0.0024%        | Na                        | 114,442.2   | 1.88%    | 0.0086%        |
| O                        | 5,322,273.2  | 34.66%   | 0.0010%        | O                           | 8,015,026.6  | 30.95%   | 0.0008%        | O                          | 6,174,461.9  | 32.28%   | 0.0008%        | O                         | 1,516,022.6 | 24.90%   | 0.0018%        |
|                          |              |          |                | P                           | 279.6        | 0.00%    | 0.0009%        | P                          | 2664.4       | 0.01%    | 0.0013%        |                           |             |          |                |
|                          |              |          |                | S                           | 10,989.7     | 0.04%    | 0.0217%        | S                          | 24,218.6     | 0.13%    | 0.0308%        |                           |             |          |                |
|                          |              |          |                | Specimen 1670_0.12 Yatalase |              |          |                |                            |              |          |                |                           |             |          |                |
|                          |              |          |                | Element                     | Atom count   | Atomic % | Atomic error % |                            |              |          |                |                           |             |          |                |
|                          |              |          |                | C                           | 577,191.4    | 4.802%   | 0.0005%        |                            |              |          |                |                           |             |          |                |
|                          |              |          |                | Ca                          | 7,308,407.3  | 60.800%  | 0.0205%        |                            |              |          |                |                           |             |          |                |
|                          |              |          |                | H                           | 335,378.4    | 2.790%   | 0.0049%        |                            |              |          |                |                           |             |          |                |
|                          |              |          |                | N                           | 2476.6       | 0.021%   | 0.0004%        |                            |              |          |                |                           |             |          |                |
|                          |              |          |                | Na                          | 7859.6       | 0.065%   | 0.0051%        |                            |              |          |                |                           |             |          |                |
|                          |              |          |                | O                           | 3,789,062.4  | 31.522%  | 0.0009%        |                            |              |          |                |                           |             |          |                |
